# Supplementary material for: Transcriptomic response to salinity variation in native and introduced mud-tidal gastropod Batillaria attramentaria
Source: Frontiers journal article supplement (doi:10.3389/fmars.2023.1251815), 2023-11-29
Supplement: Data_Sheet_1.docx [file Data_Sheet_1.docx]

Transcriptomic response to salinity variation in native and introduced mud tidal gastropod *Batillaria attramentaria*

Ajit Kumar Patra†1*, Phuong-Thao Ho†2,3, Yong-Jin Won1*

1 Department of Life Science, Division of EcoScience, Ewha Womans University, Seoul, 03760 Korea

2 Laboratory of Ecology and Environmental Management, Science and Technology Advanced Institute, Van Lang University, Ho Chi Minh City, Vietnam

3 Department of International Program, US Vietnam Talent International School, Ho Chi Minh City, Vietnam


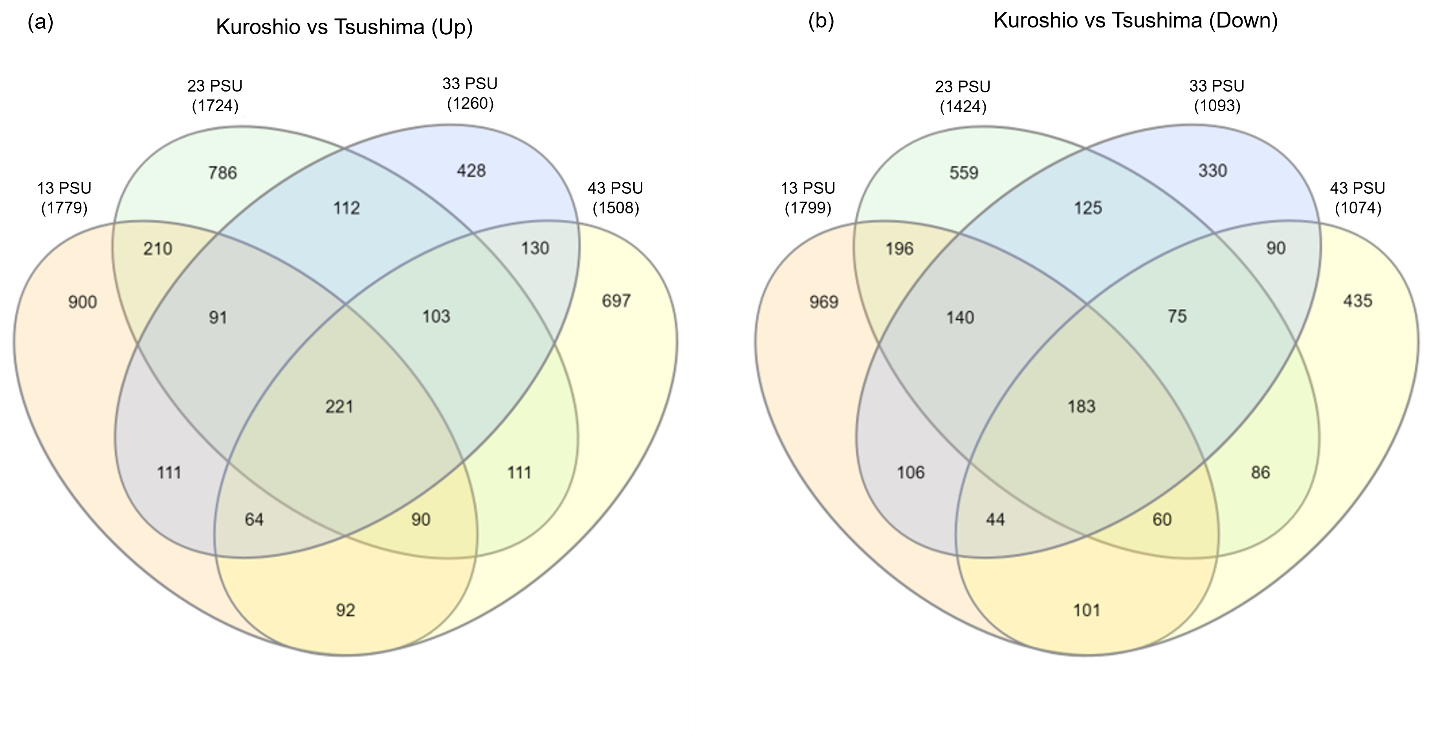


**Supplementary Figure 1.** Venn diagram showing number DEGs of the Kuroshio vs. Tsushima snail population (A) up regulated and (B) down regulated under continuous exposure to the different salinity (13, 23, 33, and 43 PSU). Result shown are with (|fc| ≥2, *p* <0.05).


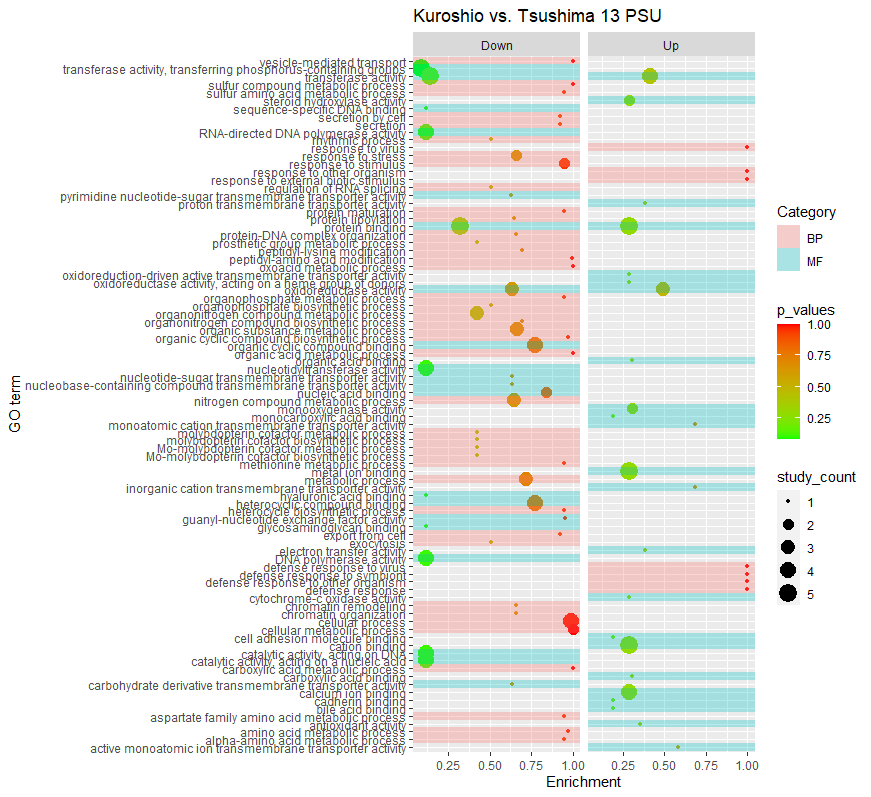


**Supplementary Figure 2.** GO enrichment plot of DEGs of Kuroshio vs. Tsushima lineage snail populations under 13 PSU salinity condition.


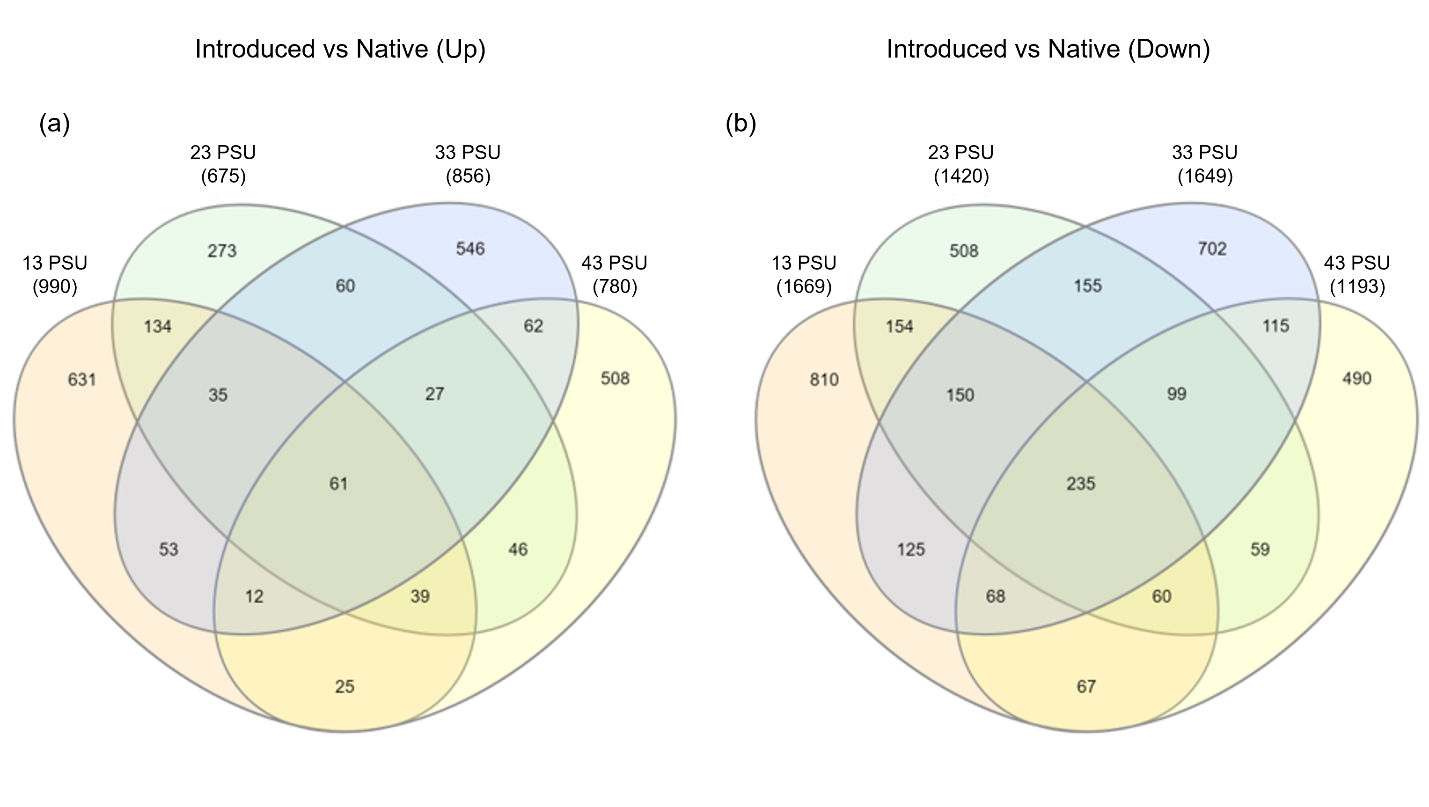


**Supplementary Figure 3.** Venn diagram showing number DEGs of the introduced vs. native snail population (A) up regulated and (B) down regulated under continuous exposure to the different salinity (13, 23, 33, and 43 PSU). Result shown are with (|fc| ≥2, *p* <0.05).


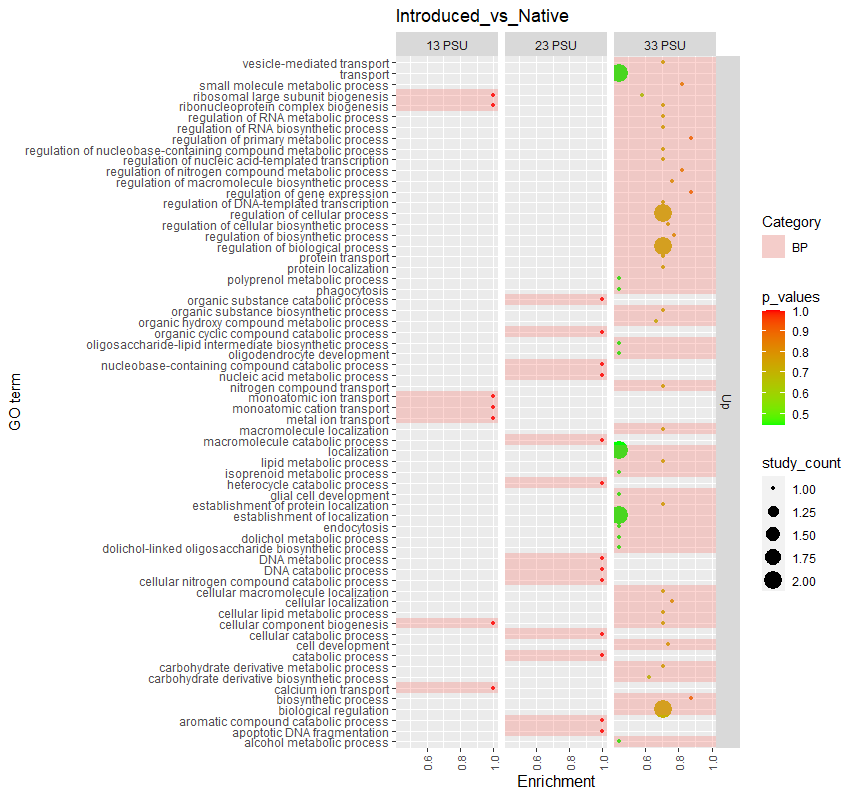


**Supplementary Figure 4A.** Plot showing GO enrichment of in the Biological Process (BP) category, up regulated DEGs of Introduced vs. Native snail populations under 13, 23, and 33 PSU salinity condition. Up regulated GO enriched genes under 43 PSU in BP category are not found.


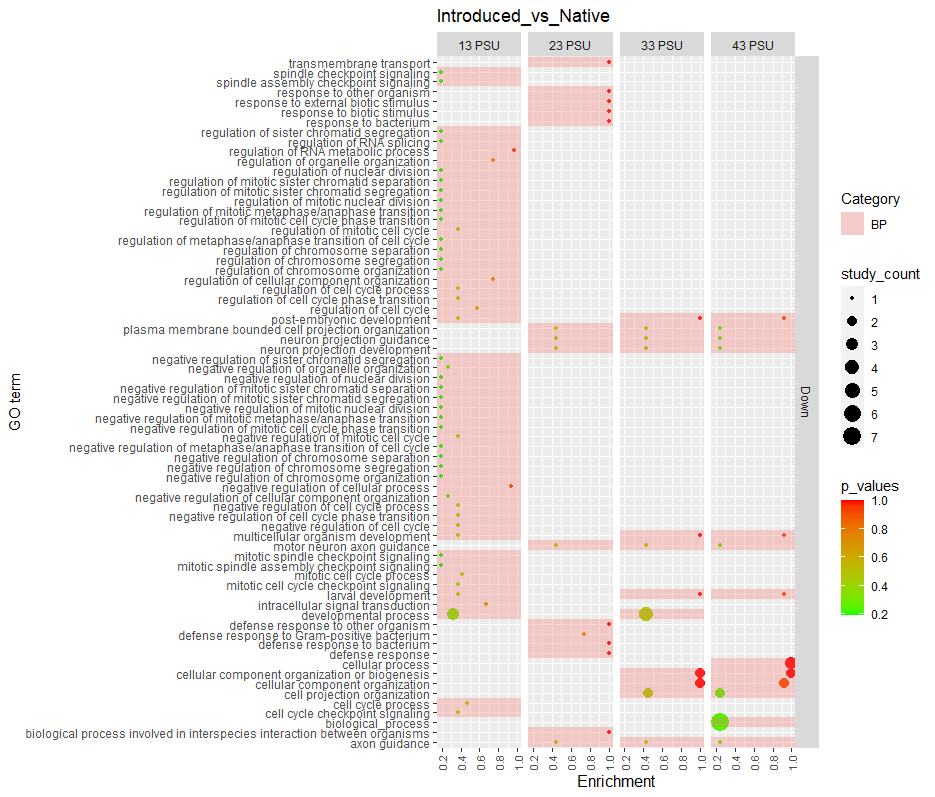


**Supplementary Figure 4B.** Plot showing GO enrichment of in the Biological Process (BP) category, down regulated DEGs of Introduced vs. Native snail populations under 13, 23, 33, and 43 PSU salinity condition.


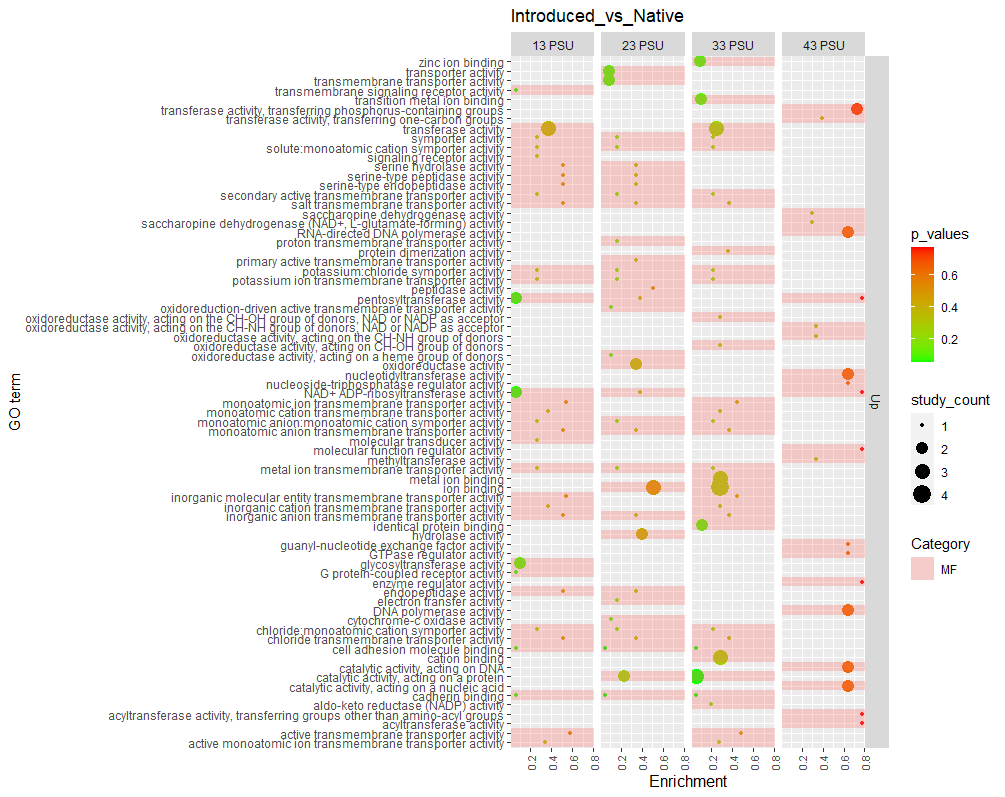


**Supplementary Figure 4C.** Plot showing GO enrichment of in the Molecular Function (MF) category, up regulated DEGs of Introduced vs. Native snail populations under 13, 23, 33, and 43 PSU salinity condition.


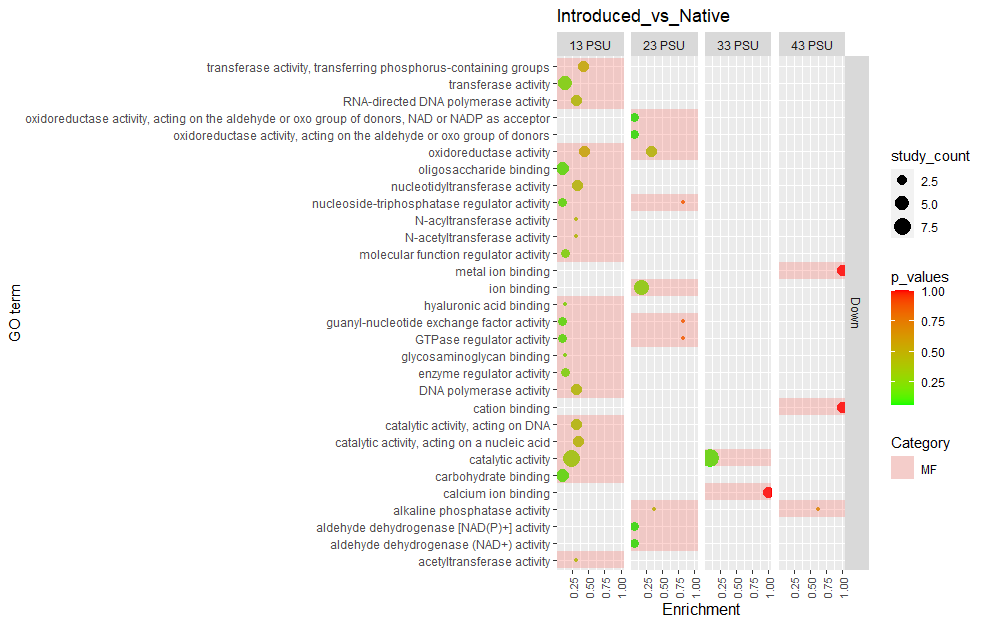


**Supplementary Figure 4D.** Plot showing GO enrichment of in the Molecular Function (MF) category, down regulated DEGs of Introduced vs. Native snail populations under 13, 23, 33, and 43 PSU salinity condition.


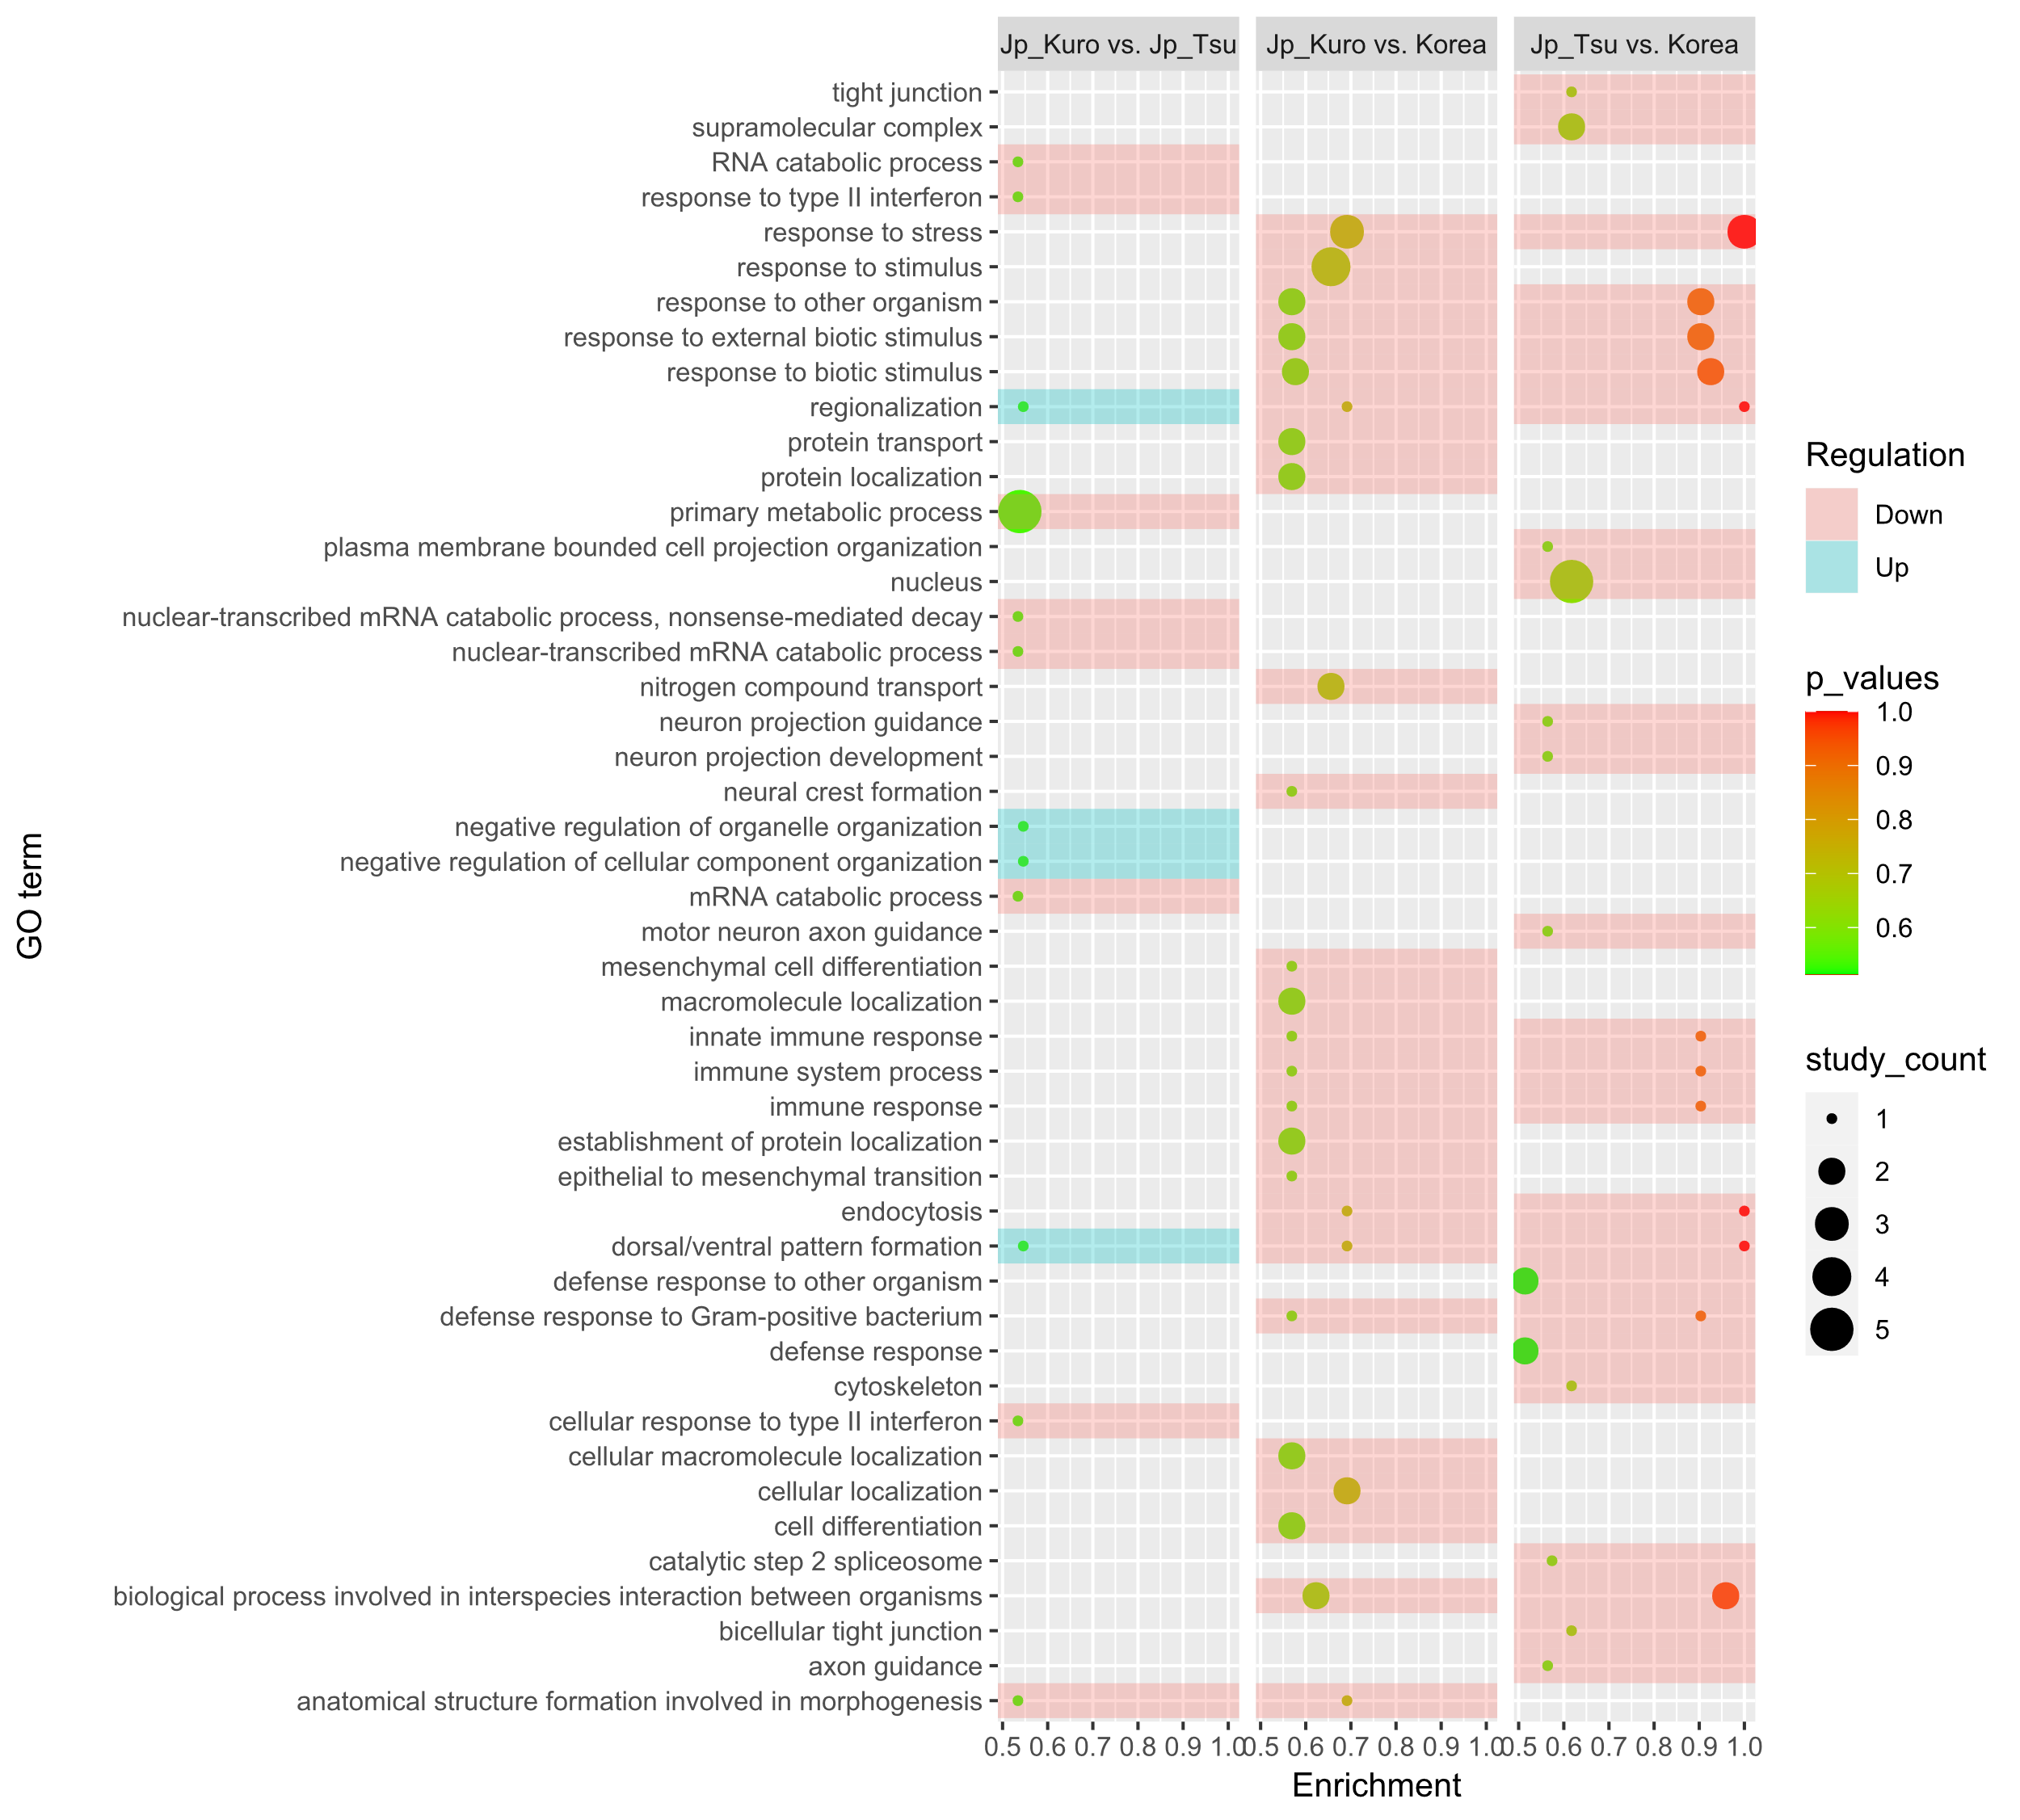


**Supplementary Figure 5A.** Plot showing GO enrichment of up and down regulated DEGs of Japan vs. Korea snail populations.


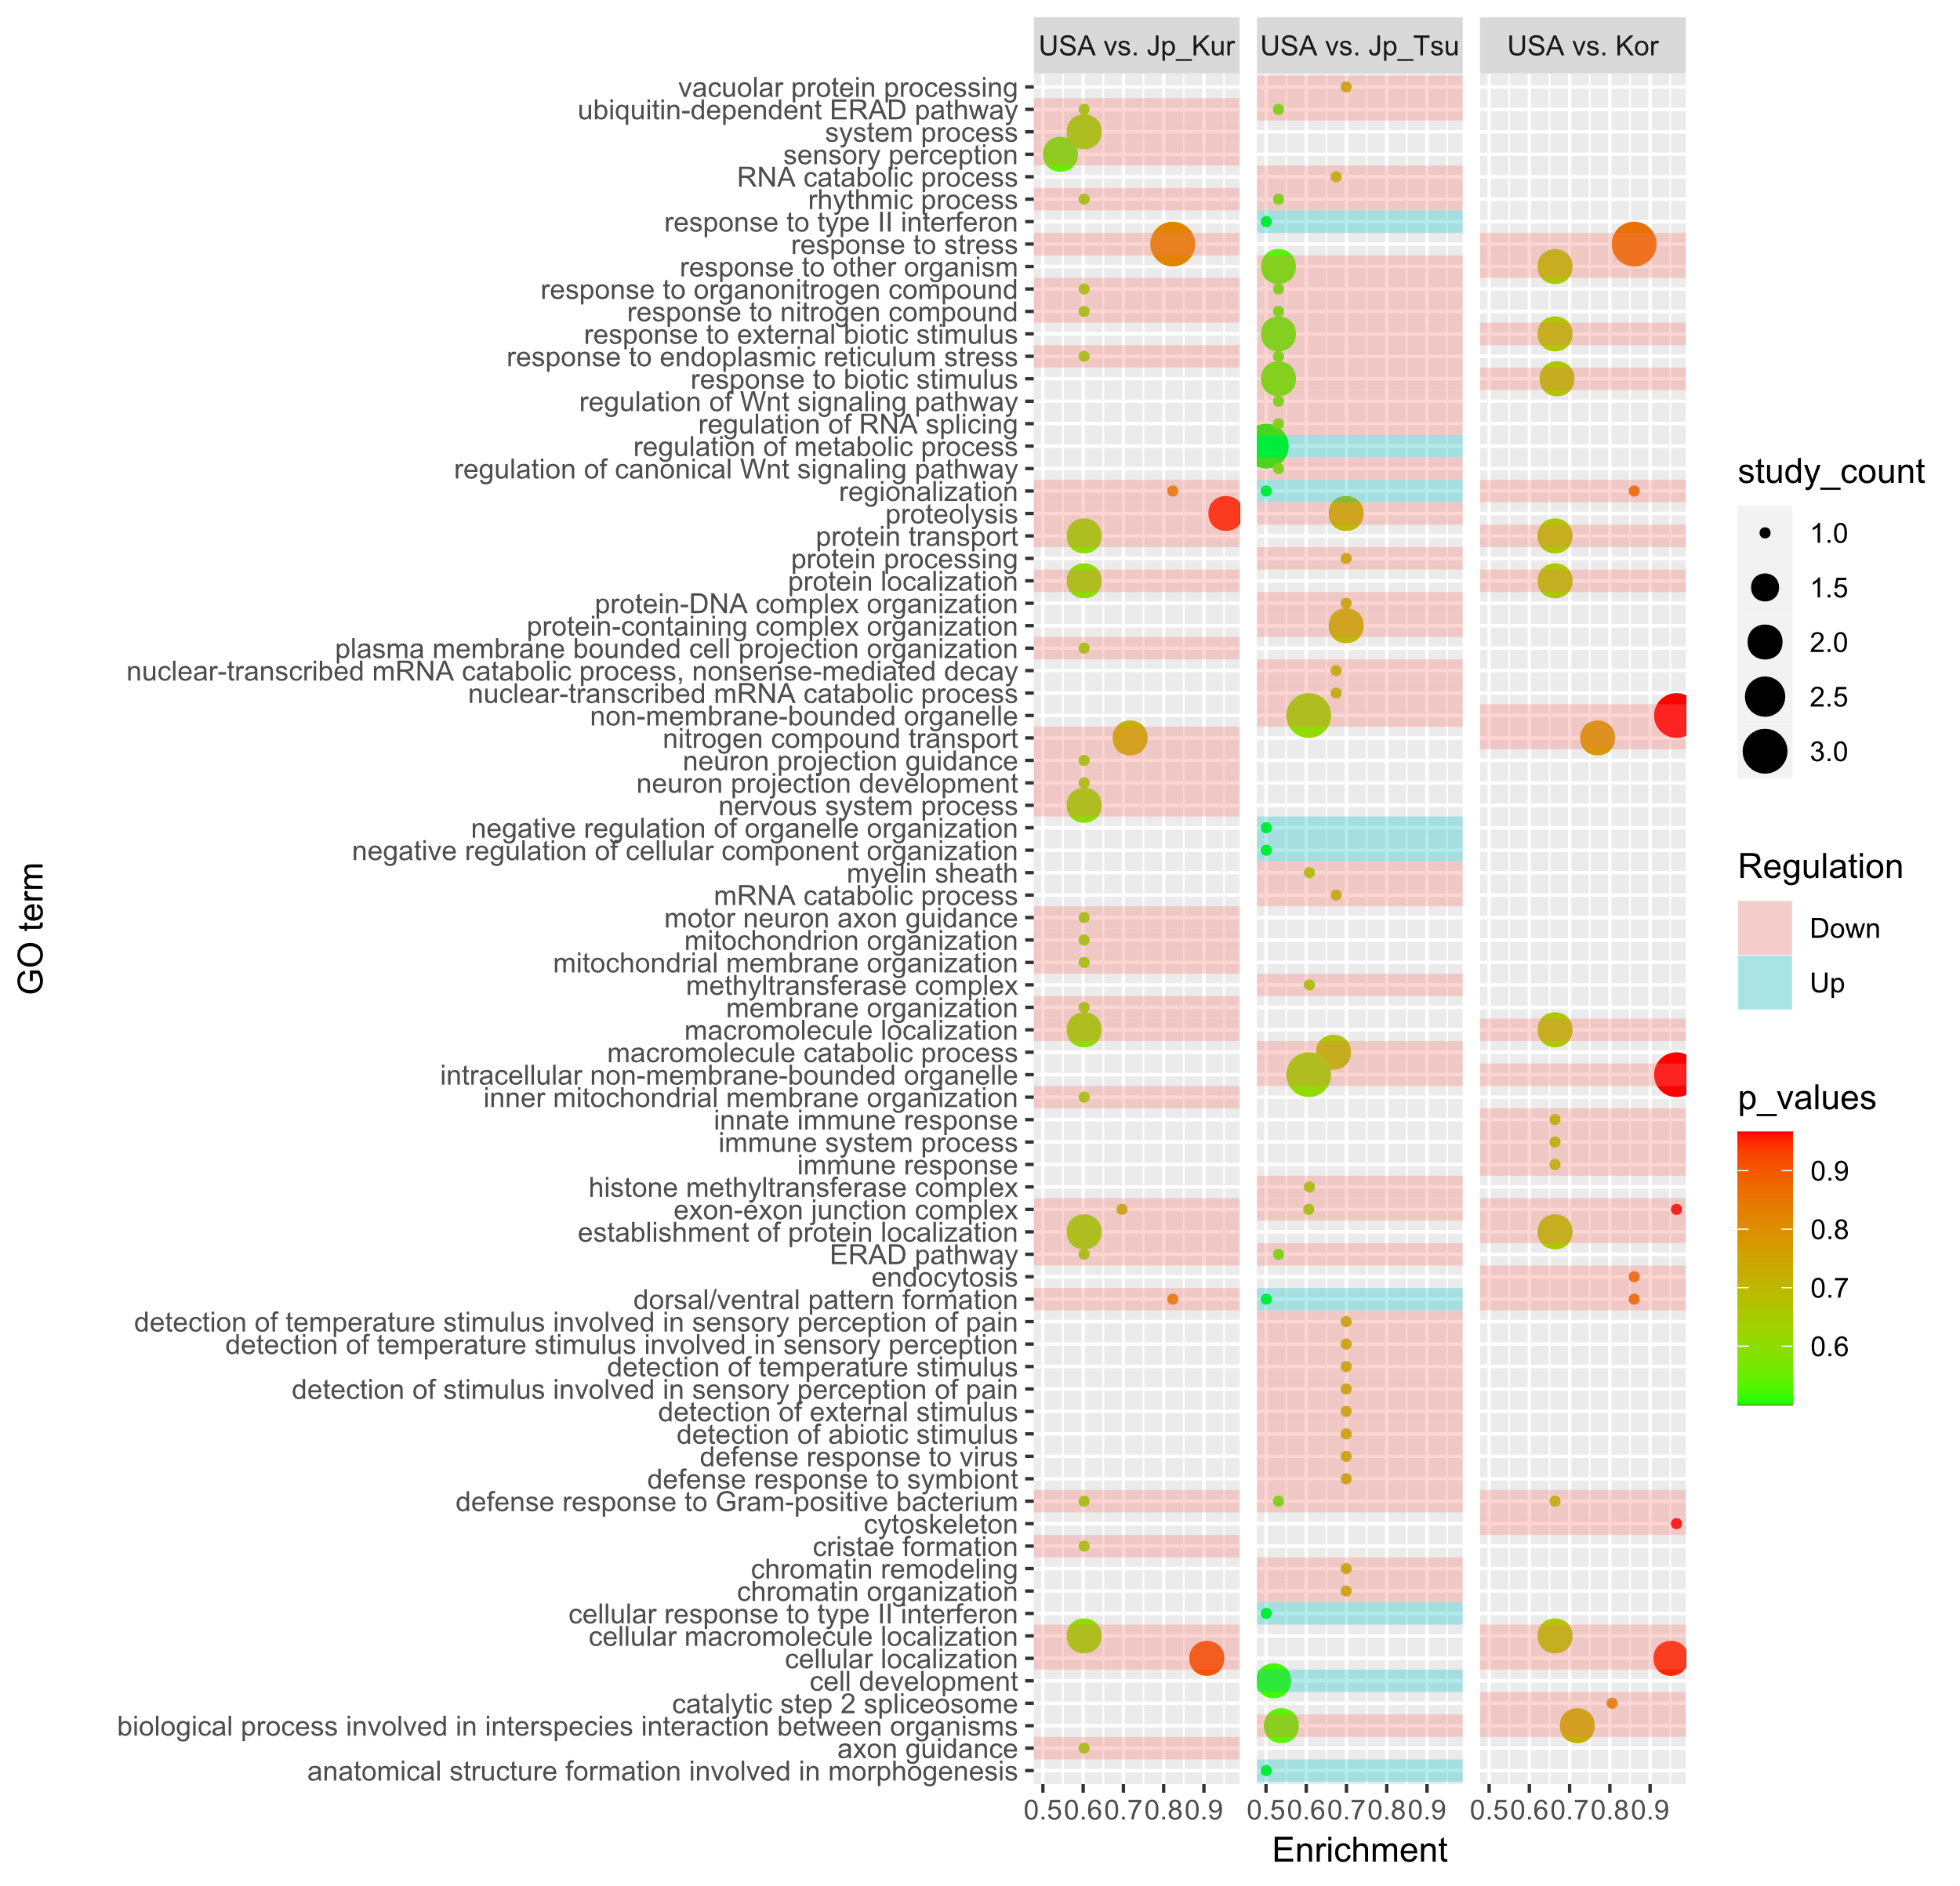


**Supplementary Figure 5B.** Plot showing GO enrichment of up and down regulated DEGs USA vs. Korea and Japan snail populations.


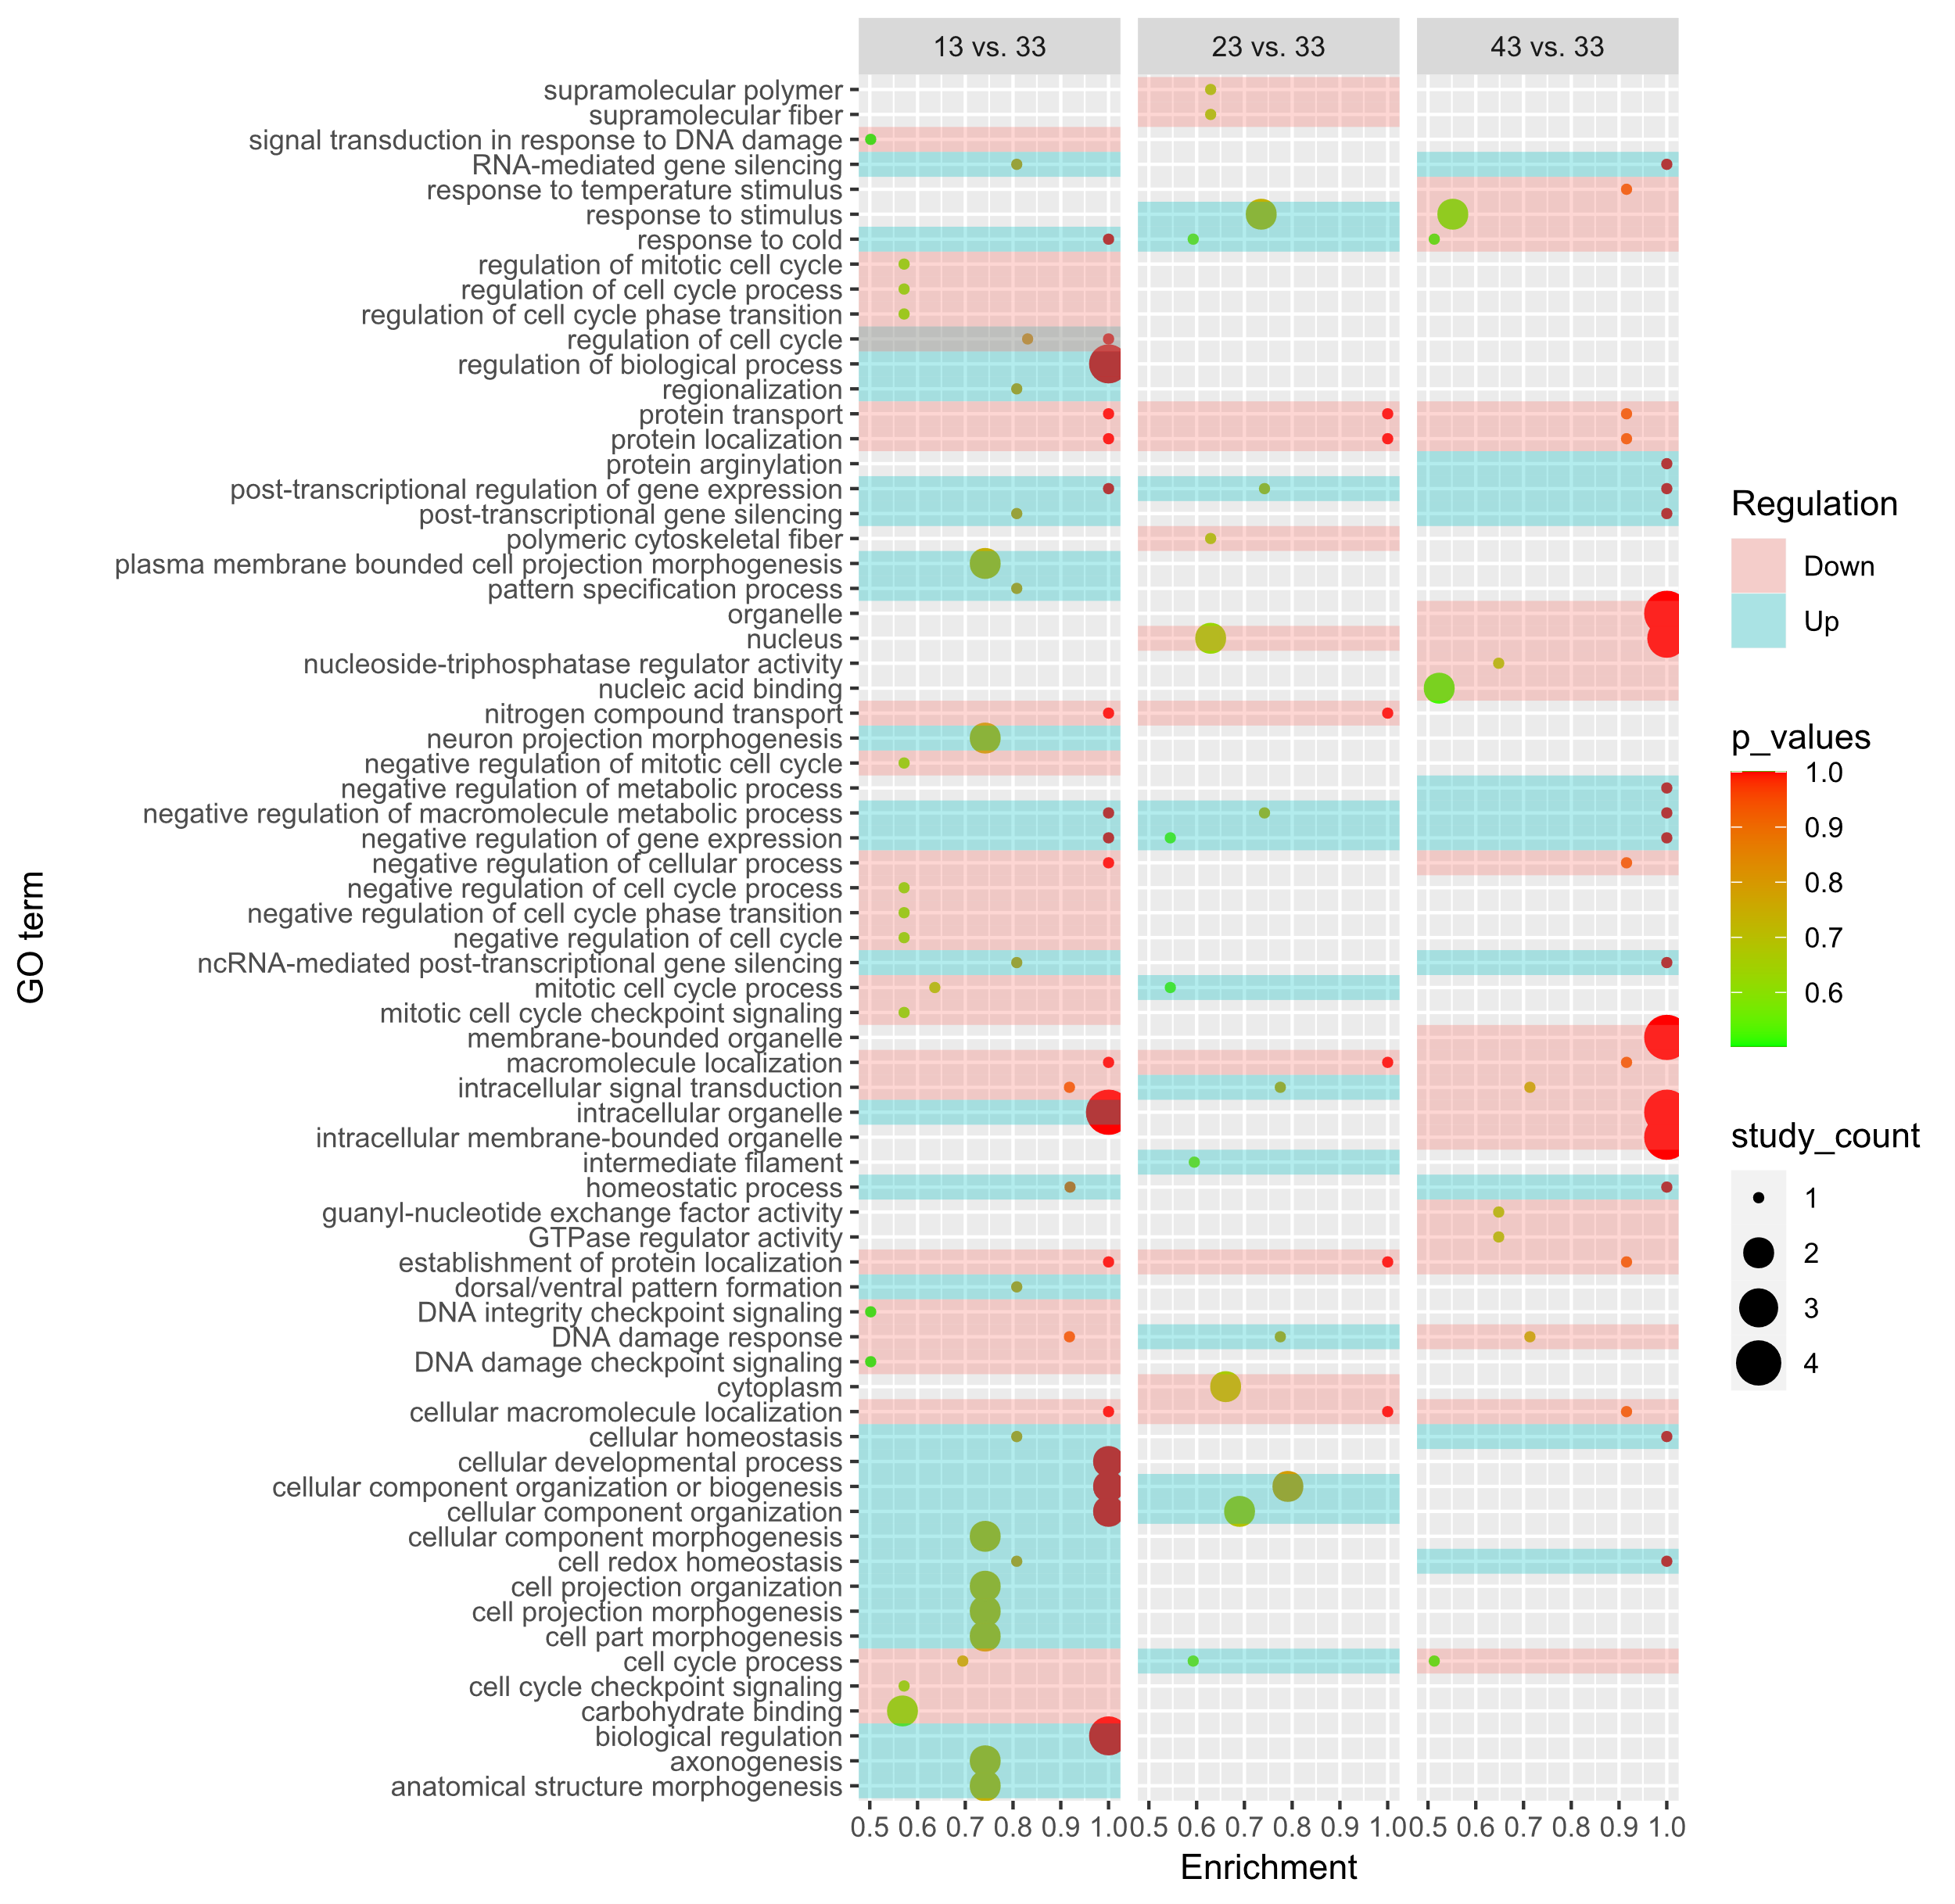


**Supplementary Figure 6.** Plot showing GO enrichment of up and down regulated DEGs of snail populations exposed to salinity (13, 23 and 43) vs. 33 PSU salinity.


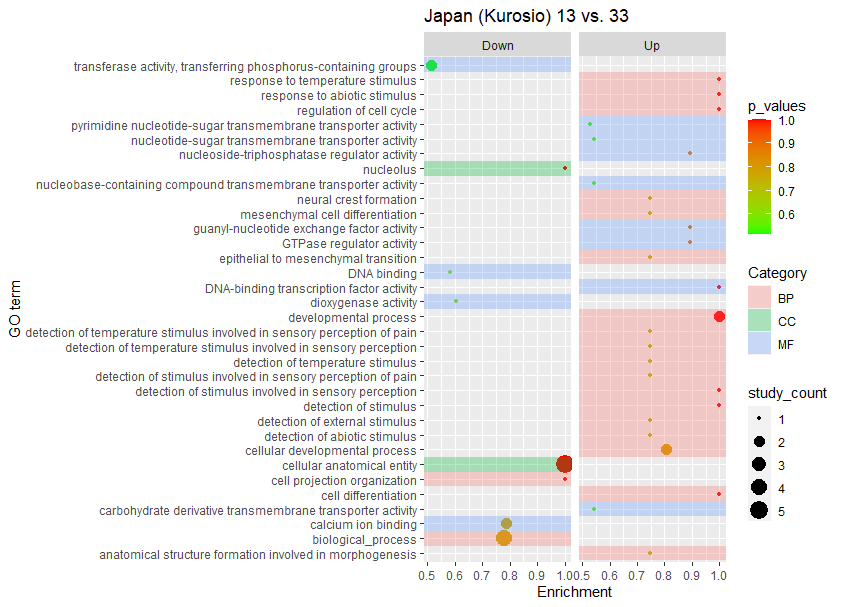


**Supplementary Figure 7A.** Bubble plot showing GO enrichment of up and down regulated DEGs of the Japan Kuroshio snail population exposed to 13PSU in comparison to the control (33 PSU).


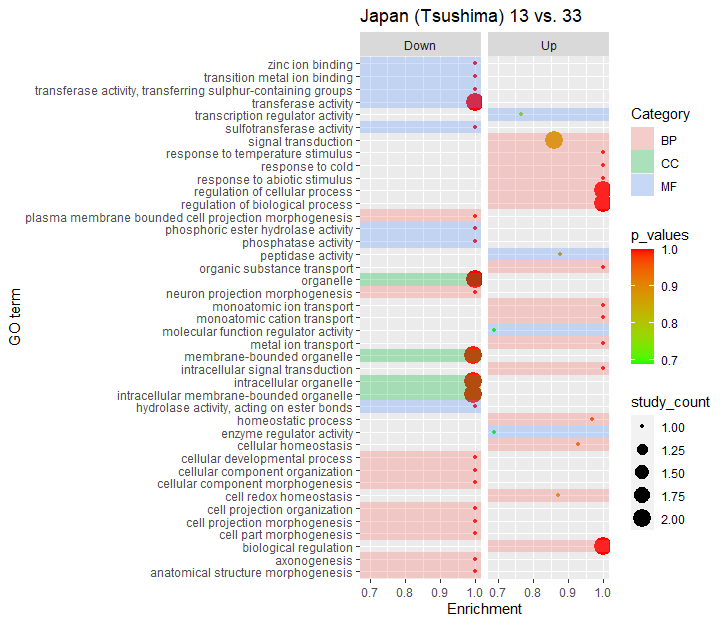


**Supplementary Figure 7B.** Bubble plot showing GO enrichment of up and down regulated DEGs of the Japan Tsushima snail population exposed to 13 PSU in comparison to the control (33 PSU).


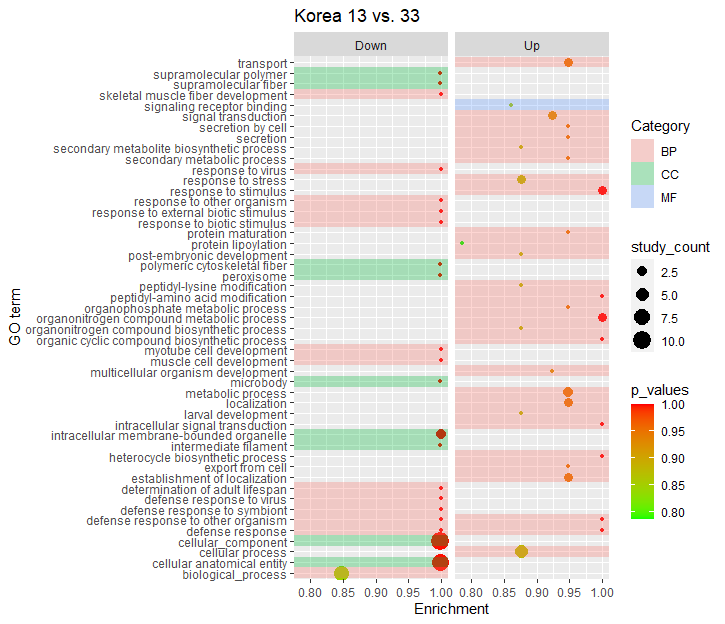


**Supplementary Figure 7C.** Bubble plot showing GO enrichment of up and down regulated DEGs of the Korea snail population exposed to 13 PSU in comparison to the control (33 PSU).


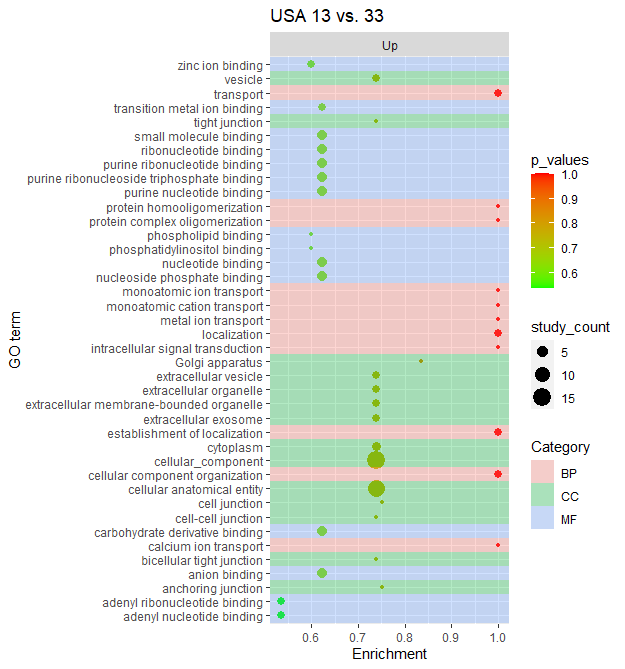

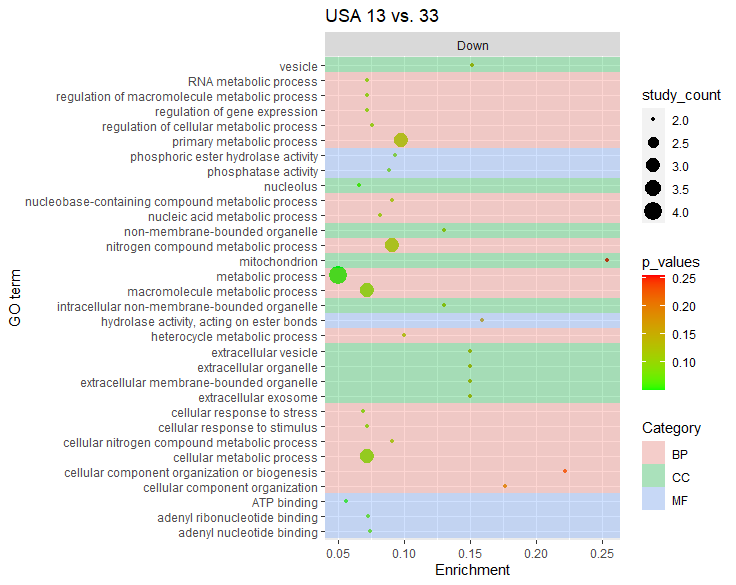


**Supplementary Figure 7D.** Bubble plot showing GO enrichment of up and down regulated DEGs of the USA snail population exposed to 13 PSU in comparison to the control (33 PSU).
